# Supplementary material for: Reno-Protective Effect of GLP-1 Receptor Agonists in Type1 Diabetes: Dual Action on TRPC6 and NADPH Oxidases
Source: MDPI journal article supplement (doi:10.3390/biomedicines9101360), 2021-09-30
Supplement: s1 [file s1]

**Table S1.** List of primers.

| Primer            | Sequence                                                        |
|-------------------|-----------------------------------------------------------------|
| Fibronectin (rFn) | F: 5'-CGGGAACATCATCGGATCGT-3'<br>R: 5'-GGAGAACCAGGAGAGCACAC-3'  |
| Nephrin (rNph)    | F: 5'-GTGACCTCAGTGATGACGCA-3'<br>R: 5'-TAGGAGACACAAGCTCGGGA-3'  |
| DUOX1 (DUOX-1)    | F: 5'-AGGCACTGGTGGAAAACATC-3'<br>R: 5'-GGAGAAAAGGTGCCTGAAAA-3'  |
| DUOX2 (DUOX-2)    | F: 5'-GAAGTCCACAGCAGCATCAA-3'<br>R: 5'-CCACGGACATTGAAGAAACC-3'  |
| AMPK (AMPK-α1)    | F: 5'-GCAGTTGCCTACCACCTCAT-3'<br>R: 5'-GTACGCCTTGGTGTGTTGGAT-3' |
| GAPDH             | F: 5'-GGGGCTCTCTGCTCCTCCTG-3'<br>R: 5'-CGGCCAAATCCGTTACACCG-3'  |

**Table S2.** Gene Ontology biological process associated with TRPC6 protein interactions network obtained from GeneMANIA database.

| Gene         | Description                                                                                           | Rank |
|--------------|-------------------------------------------------------------------------------------------------------|------|
| <i>DUOX1</i> | dual oxidase 1 [Source:HGNC Symbol;Acc:HGNC:3062]                                                     | N/A  |
| <i>DUOX2</i> | dual oxidase 2 [Source:HGNC Symbol;Acc:HGNC:13273]                                                    | N/A  |
| <i>GLP1R</i> | glucagon like peptide 1 receptor [Source:HGNC Symbol;Acc:HGNC:4324]                                   | N/A  |
| <i>TRPC6</i> | transient receptor potential cation channel subfamily C member 6 [Source: HGNC Symbol;Acc:HGNC:12338] | N/A  |
| <i>GCG</i>   | glucagon [Source:HGNC Symbol;Acc:HGNC:4191]                                                           | 1    |
| <i>GNAS</i>  | GNAS complex locus [Source:HGNC Symbol;Acc:HGNC:4392]                                                 | 2    |
| <i>TPO</i>   | thyroid peroxidase [Source:HGNC Symbol;Acc:HGNC:12015]                                                | 3    |
| <i>KCNQ5</i> | potassium voltage-gated channel subfamily Q member 5 [Source:HGNC Symbol;Acc:HGNC:6299]               | 4    |
| <i>KCNQ4</i> | potassium voltage-gated channel subfamily Q member 4 [Source:HGNC Symbol;Acc:HGNC:6298]               | 5    |
| <i>KCNQ2</i> | potassium voltage-gated channel subfamily Q member 2 [Source:HGNC Symbol;Acc:HGNC:6296]               | 6    |
| <i>KCNQ3</i> | potassium voltage-gated channel subfamily Q member 3 [Source:HGNC Symbol;Acc:HGNC:6297]               | 7    |
| <i>NPHS2</i> | NPHS2 podocin [Source:HGNC Symbol;Acc:HGNC:13394]                                                     | 8    |
| <i>ORAI1</i> | ORAI calcium release-activated calcium modulator 1 [Source:HGNC Symbol; Acc:HGNC:25896]               | 9    |
| <i>RNF24</i> | ring finger protein 24 [Source:HGNC Symbol;Acc:HGNC:13779]                                            | 10   |
| <i>SP3</i>   | Sp3 transcription factor [Source:HGNC Symbol;Acc:HGNC:11208]                                          | 11   |
| <i>TRPC7</i> | transient receptor potential cation channel subfamily C member 7 [Source: HGNC Symbol;Acc:HGNC:20754] | 12   |
| <i>NPHS1</i> | NPHS1 nephrin [Source:HGNC Symbol;Acc:HGNC:7908]                                                      | 13   |
| <i>ITPR3</i> | inositol 1,4,5-trisphosphate receptor type 3 [Source:HGNC Symbol;Acc: HGNC:6182]                      | 14   |
| <i>PRKG2</i> | protein kinase, cGMP-dependent, type II [Source:HGNC Symbol;Acc:HGNC: 9416]                           | 15   |
| <i>PRKG1</i> | protein kinase, cGMP-dependent, type I [Source:HGNC Symbol;Acc:HGNC: 9414]                            | 16   |
| <i>TRPC3</i> | transient receptor potential cation channel subfamily C member 3 [Source: HGNC Symbol;Acc:HGNC:12335] | 17   |
| <i>TRPC4</i> | transient receptor potential cation channel subfamily C member 4 [Source: HGNC Symbol;Acc:HGNC:12336] | 18   |
| <i>TRPC5</i> | transient receptor potential cation channel subfamily C member 5 [Source: HGNC Symbol;Acc:HGNC:12337] | 19   |
| <i>TRPM2</i> | transient receptor potential cation channel subfamily M member 2 [Source: HGNC Symbol;Acc:HGNC:12339] | 20   |
